# Supplementary material for: Three unprecedent polycational templated cuprous thiocyanate networks: synthesis, structure, and properties
Source: Royal Society of Chemistry journal article supplement (doi:10.1039/c3ce41430b), 2013-01-01
Supplement: c3ce41430b.pdf [file c3ce41430b.pdf]

## Supporting Information

### Three Unprecedented Polycationic Templated Cupreous Thiocyanate Networks: Synthesis, Structure, and Properties

Li Li,<sup>a</sup> Lu Zhu,<sup>a</sup> Zhong-Cheng Yue,<sup>a</sup> Wen-Li Zhang,<sup>a</sup> Bing Zhang,<sup>b</sup> Yun-Yin Niu<sup>\*ac</sup> and Hong-Wei Hou<sup>a</sup>

<sup>a</sup>College of Chemistry and Molecular Engineering, Zhengzhou University, Zhengzhou 450001, P. R. China. Email: niuyy@zzu.edu.cn

<sup>b</sup>School of Chemical Engineering and Energy, Zhengzhou University, Zhengzhou 450001, P. R. China.

<sup>c</sup>State Key Lab of Coordination Chemistry, Nanjing University, Nanjing210093, P. R. China

**Table S1.** Bond Lengths (Å) and Angles (deg) for **1-3**

| Compound 1              |            |                         |            |                                      |            |
|-------------------------|------------|-------------------------|------------|--------------------------------------|------------|
| Cu1- S1                 | 2.3648(14) | Cu1- S3                 | 2.3602(13) | Cu1- N1 <sup>1</sup>                 | 2.023(4)   |
| Cu1- N2                 | 1.953(4)   | Cu2- S2 <sup>2</sup>    | 2.5188(16) | Cu2- N3                              | 1.957(4)   |
| Cu2- N4                 | 1.983(4)   | Cu2- N6 <sup>3</sup>    | 2.021(4)   | Cu3- S4                              | 2.3432(14) |
| Cu3- S5                 | 2.3633(16) | Cu3- S6                 | 2.4018(14) | Cu3- N5 <sup>4</sup>                 | 1.954(4)   |
| S2- Cu2 <sup>5</sup>    | 2.5188(16) | N1- Cu1 <sup>6</sup>    | 2.022(4)   | N5- Cu3 <sup>7</sup>                 | 1.954(4)   |
| N6- Cu2 <sup>8</sup>    | 2.021(4)   |                         |            |                                      |            |
| S3-Cu1- S1              | 111.97(5)  | N1 <sup>1</sup> -Cu1-S1 | 98.04(12)  | N1 <sup>1</sup> -Cu1- S3             | 111.23(13) |
| N2-Cu1-S1               | 112.48(14) | N2-Cu1- S3              | 109.45(12) | N2-Cu1-N1 <sup>1</sup>               | 113.34(17) |
| N3-Cu2-S2 <sup>2</sup>  | 112.18(14) | N3-Cu2- N4              | 122.41(19) | N3-Cu2-N6 <sup>3</sup>               | 113.48(18) |
| N4-Cu2-S2 <sup>2</sup>  | 96.41(14)  | N4-Cu2-N6 <sup>3</sup>  | 110.39(18) | N6 <sup>3</sup> -Cu2-S2 <sup>2</sup> | 97.87(14)  |
| S4- Cu3- S5             | 106.16(6)  | S4- Cu3- S6             | 110.07(5)  | S5- Cu3- S6                          | 104.35(6)  |
| N5 <sup>4</sup> -Cu3-S4 | 110.07(14) | N5 <sup>4</sup> -Cu3-S5 | 117.08(14) | N5 <sup>4</sup> -Cu3- S6             | 108.87(13) |
| C1-S1- Cu1              | 106.47(16) | C2-S2- Cu2 <sup>5</sup> | 111.22(17) | C3- S3- Cu1                          | 103.75(15) |
| C4-S4- Cu3              | 109.88(16) | C5- S5- Cu3             | 104.63(17) | C6- S6- Cu3                          | 110.44(15) |
| C1-N1-Cu1 <sup>6</sup>  | 167.3(4)   | C2-N2- Cu1              | 172.4(4)   | C3-N3- Cu2                           | 173.4(4)   |
| C4-N4- Cu2              | 172.5(4)   | C5-N5-Cu3 <sup>7</sup>  | 173.5(4)   | C6-N6-Cu2 <sup>8</sup>               | 158.4(4)   |
| Compound 2              |            |                         |            |                                      |            |
| Cu1- S2                 | 2.4091(12) | Cu1- S3                 | 2.3518(12) | Cu1- N1                              | 1.962(4)   |
| Cu1- N2 <sup>1</sup>    | 2.013(3)   | Cu2- S5                 | 2.4275(12) | Cu2- N3                              | 1.976(3)   |
| Cu2- N4                 | 1.971(4)   | Cu2- N5 <sup>2</sup>    | 1.998(3)   | N2- Cu1 <sup>3</sup>                 | 2.013(3)   |
| N5- Cu2 <sup>4</sup>    | 1.998(3)   |                         |            |                                      |            |
| S3-Cu1-S2               | 102.84(4)  | N1-Cu1-S2               | 110.61(12) | N1-Cu1-S3                            | 119.60(11) |

<sup>†</sup> Electronic supplementary information (ESI) available: experimental and simulated powder XRD patterns, IR spectra, and the detailed crystallographic data and structural refinement parameters for **1-3**. CCDC reference numbers 900604 for **1**, 926422 for **2**, 926179 for **3**.

|                        |            |                         |            |                          |            |
|------------------------|------------|-------------------------|------------|--------------------------|------------|
| N1-Cu1-N2 <sup>1</sup> | 108.47(14) | N2 <sup>1</sup> -Cu1-S2 | 109.28(10) | N2 <sup>1</sup> -Cu1-S3  | 105.59(12) |
| N3-Cu2- S5             | 101.66(11) | N3-Cu2- N5 <sup>2</sup> | 113.27(16) | N4-Cu2- S5               | 107.72(11) |
| N4-Cu2- N3             | 114.36(15) | N4-Cu2- N5 <sup>2</sup> | 109.33(13) | N5 <sup>2</sup> -Cu2- S5 | 110.10(9)  |
| C2- S2- Cu1            | 103.87(13) | C3-S3- Cu1              | 105.85(15) | C5-S5- Cu2               | 107.85(12) |
| C1-N1- Cu1             | 163.5(3)   | C2-N2-Cu1 <sup>3</sup>  | 162.7(3)   | C3-N3-Cu2                | 166.4(4)   |
| C4-N4-Cu2              | 166.6(3)   | C5-N5- Cu2 <sup>4</sup> | 167.7(3)   |                          |            |
| <b>Compound 3</b>      |            |                         |            |                          |            |
| Cu(1)-N(6)             | 1.975(6)   | Cu(1)-N(1)              | 1.986(7)   | Cu(1)-S(6)               | 2.377(2)   |
| Cu(1)-S(1)             | 2.414(2)   | Cu(2)-N(3)              | 1.957(7)   | Cu(2)-N(2)               | 1.961(7)   |
| Cu(2)-S(2)#1           | 2.334(2)   | Cu(2)-S(3)              | 2.484(3)   | S(2)-Cu(2)#4             | 2.334(2)   |
| N(6)-Cu(1)-N(1)        | 110.7(3)   | N(6)-Cu(1)-S(6)         | 107.9(2)   | N(1)-Cu(1)-S(6)          | 114.86(18) |
| N(6)-Cu(1)-S(1)        | 115.7(2)   | N(1)-Cu(1)-S(1)         | 106.56(19) | S(6)-Cu(1)-S(1)          | 100.96(7)  |
| N(3)-Cu(2)-N(2)        | 121.2(3)   | N(3)-Cu(2)-S(2)#1       | 115.3(2)   | N(2)-Cu(2)-S(2)#1        | 109.0(2)   |
| N(3)-Cu(2)-S(3)        | 110.5(2)   | N(2)-Cu(2)-S(3)         | 99.8(2)    | S(2)#1-Cu(2)-S(3)        | 97.19(9)   |
| C(2)-N(1)-Cu(1)        | 173.6(6)   | C(1)-N(2)-Cu(2)         | 160.3(7)   | C(4)#2-N(3)-Cu(2)        | 158.7(7)   |
| C(3)#3-N(6)-Cu(1)      | 166.7(7)   | C(1)-S(1)-Cu(1)         | 100.6(3)   | C(2)-S(2)-Cu(2)#4        | 101.3(3)   |
| C(4)-S(3)-Cu(2)        | 123.7(3)   | C(3)-S(6)-Cu(1)         | 104.8(3)   |                          |            |

<sup>a</sup>Symmetry codes for **1**: <sup>1</sup>1-X,-1/2+Y,1/2-Z; <sup>2</sup>-1+X,+Y,+Z; <sup>3</sup>+X,1+Y,+Z; <sup>4</sup>1/2+X,1/2-Y,1-Z; <sup>5</sup>1+X,+Y,+Z; <sup>6</sup>1-X,1/2+Y,1/2-Z; <sup>7</sup>-1/2+X,1/2-Y,1-Z; <sup>8</sup>+X,-1+Y,+Z. Symmetry codes for **2**: <sup>1</sup>-X,-1/2+Y,1-Z; <sup>2</sup>-X,-1/2+Y,-Z; <sup>3</sup>-X,1/2+Y,1-Z; <sup>4</sup>-X,1/2+Y,-Z. Symmetry codes for **3**: #1 -x+1/2,y-1/2,z; #2 x+1/2,-y+3/2,-z; #3 x-1/2,y,-z+1/2; #4 -x+1/2,y+1/2,z; #5 x+1/2,y,-z+1/2; #6 x-1/2,-y+3/2,-z; #7 -x+1,-y+1,-z+1.

**Fig. S1**

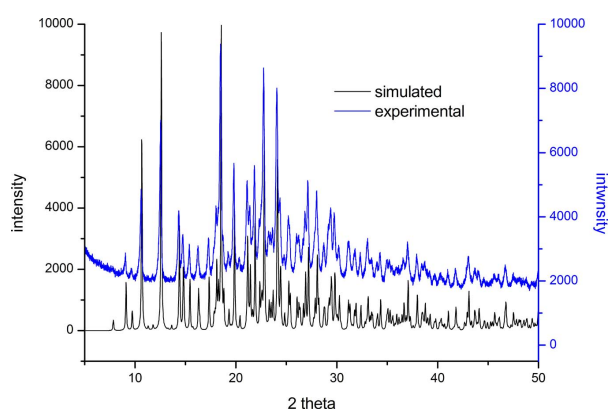

(a) The PXRD pattern of compound **1**

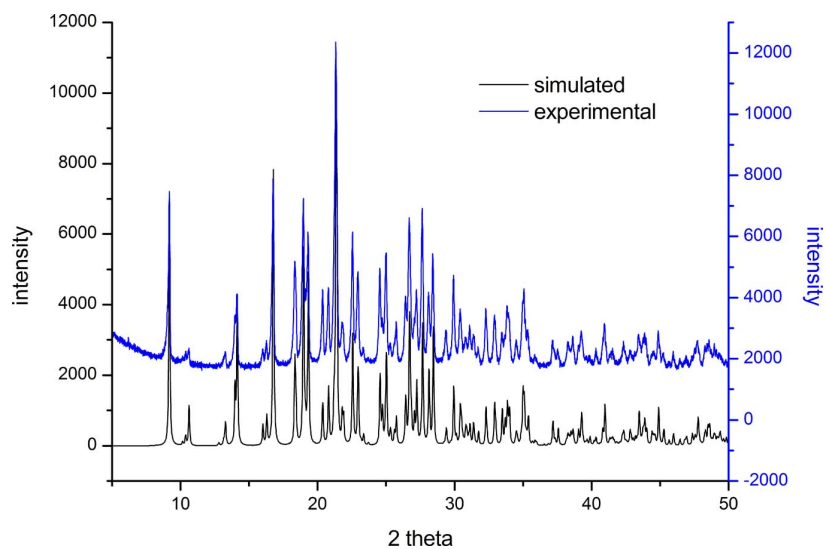

(b) The PXR D pattern of compound 2

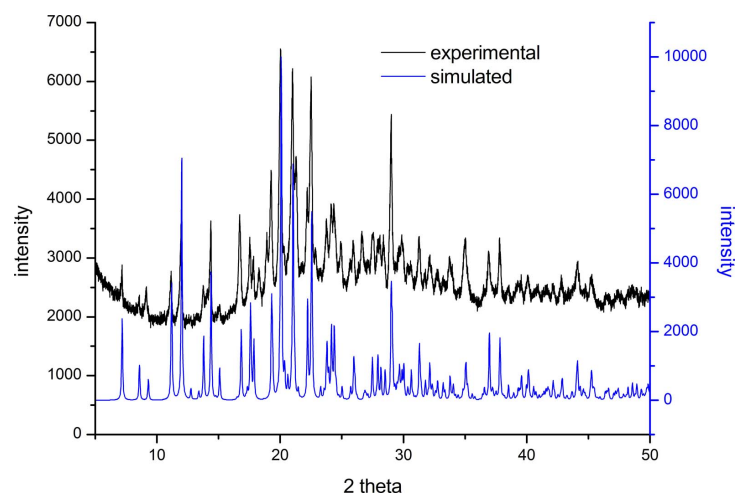

(c) The PXR D pattern of compound 3

**Fig. S2**

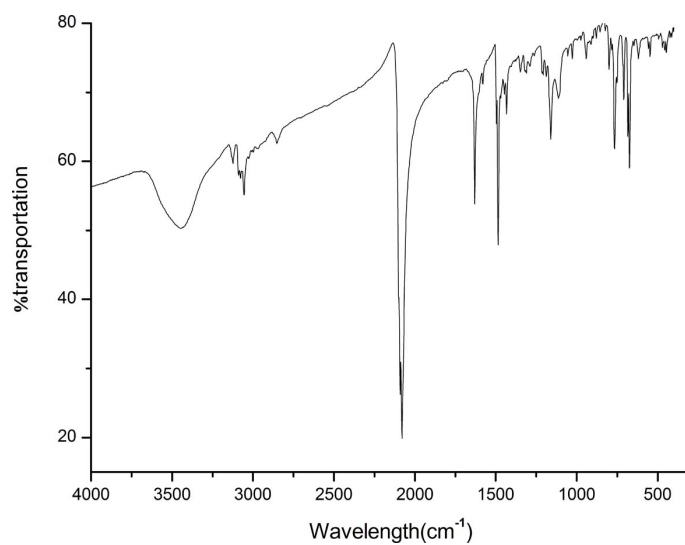

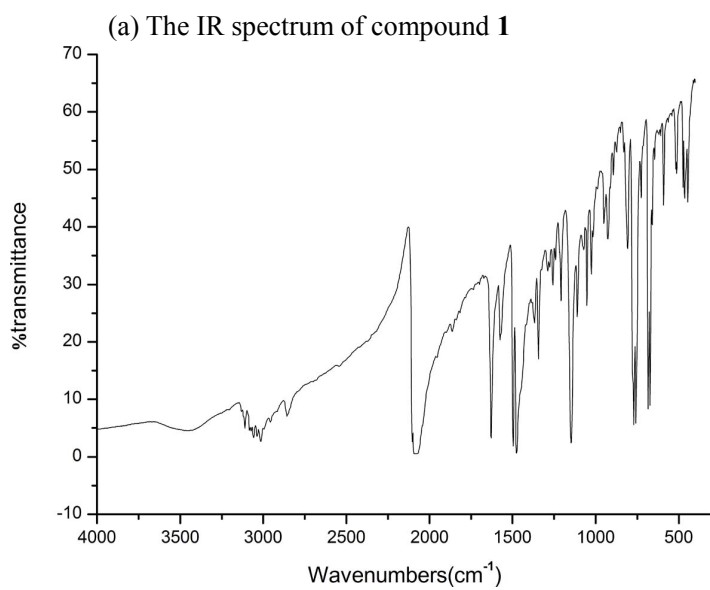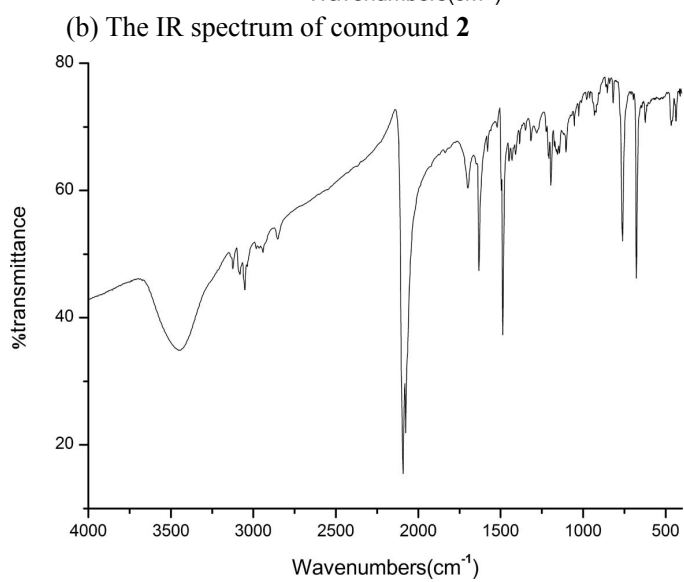

(c) The IR spectrum of compound **3**
